# The American Journal of Psychiatry

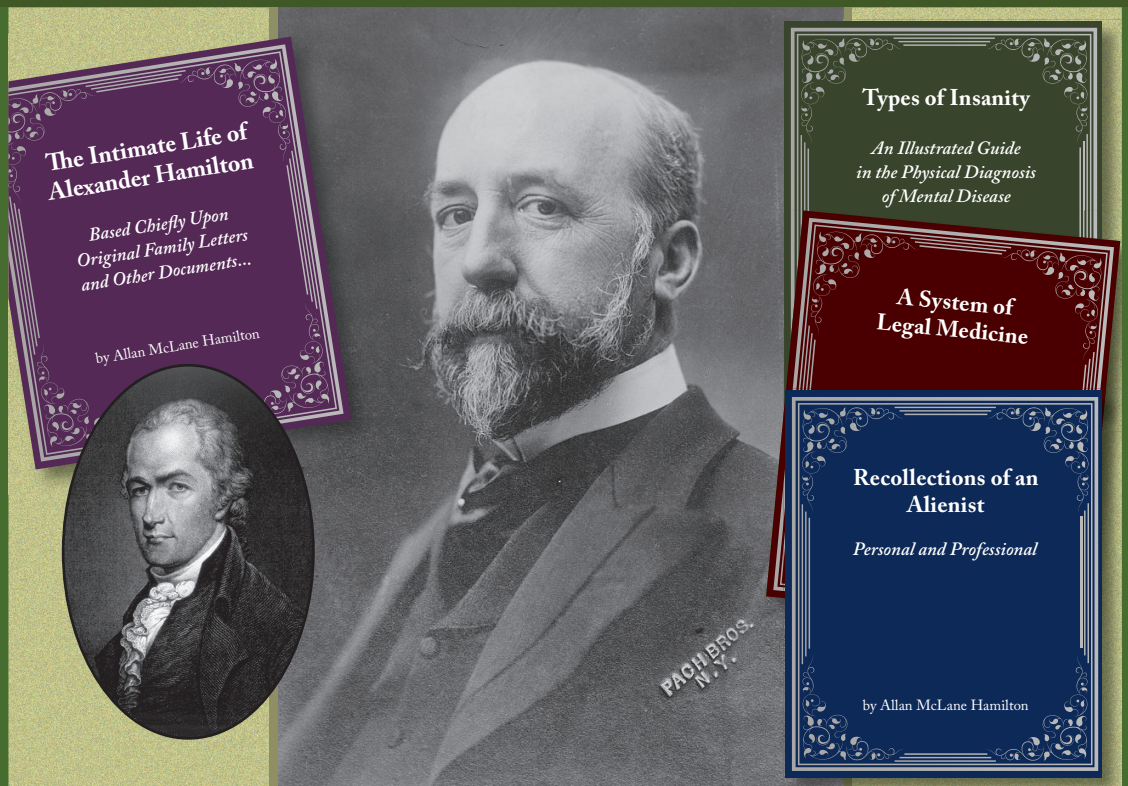

Allan McLane Hamilton

Prenatal Primary Prevention of Mental Illness by  
Micronutrient Supplements in Pregnancy

Physical Activity and Incident Depression:  
A Meta-Analysis of Prospective Cohort Studies

Medication-Assisted Treatment for Alcohol-Dependent Adults  
With Serious Mental Illness and Criminal Justice Involvement
