## PERSPECTIVAS

### EDITORIALES

- 587** ¿Puede establecerse un marco para el uso seguro de la ketamina?  
*Robert Freedman, M.D., et al.* **AUDIO**
- 590** ¿Pueden redefinirse los trastornos de personalidad en términos de rasgos de la personalidad?  
*Andrew E. Skodol, M.D.*
- 593** Sensibilización anormal de respuestas neurales y comportamentales a imágenes socialmente relevantes en individuos con trastorno límite de la personalidad: implicaciones para guiar el abordaje efectivo de tratamientos  
*Mary L. Phillips, M.D.*
- 596** Tratamiento asistido con medicamentos para los trastornos por consumo de alcohol: Esperanza para los pacientes encarcelados y para nuestras comunidades  
*Alexandra Aaronson, M.D., et al.*

### TRATAMIENTO EN PSIQUIATRÍA

- 598** Depresión resistente a los antidepresivos en pacientes con hipotiroidismo subclínico comórbido o TSH en el borde alto de lo normal  
*Bruce M. Cohen, M.D., Ph.D., et al.* **EMC**

### IMÁGENES EN PSIQUIATRÍA

- 605** Allan McLane Hamilton  
*Jonathan Davidson, M.B.B.S., F.R.C.Psych.*

### REVISIÓN Y RESEÑAS

- 607** Prevención primaria prenatal de la enfermedad mental por medio de suplementos de micronutrientes en el embarazo  
*Robert Freedman, M.D., et al.* **AUDIO • VIDEO**

## NUEVAS INVESTIGACIONES

### ARTÍCULOS

- 620** Eficacia y seguridad de la esketamina intranasal para la reducción rápida de síntomas de depresión y tendencias suicidas en pacientes en riesgo inminente de suicidio: Resultados de un estudio doble ciego, aleatorizado y controlado con placebo  
*Carla M. Canuso, M.D., et al.* **EDITORIALE • AUDIO • VIDEO**
- 631** Actividad física y depresión incidente: Un meta-análisis de estudios de cohorte prospectivos  
*Felipe B. Schuch, Ph.D., et al.* **EMC • AUDIO**
- 649** Un estudio de gemelos de la personalidad no patológica y de los conteos de los criterios del trastorno de personalidad del DSM-IV: Evidencia de influencias genéticas separadas  
*Nikolai Czajkowski, Ph.D., et al.* **EDITORIALE**
- 657** Sensibilización de la red neural de relevancia a estímulos emocionales repetidos después de la habituación inicial en pacientes con trastorno límite de la personalidad  
*Bryan T. Denny, Ph.D., et al.* **EDITORIALE**
- 665** Tratamiento asistido con medicamentos para adultos dependientes del alcohol con enfermedades mentales graves e involucrados en la justicia penal: efectos en la utilización y los resultados del tratamiento  
*Allison G. Robertson, Ph.D., M.P.H., et al.* **EDITORIALE • EMC • AUDIO**

**674 Revisión de las acciones de los medicamentos antipsicóticos a través de redes de genes asociados con la esquizofrenia**

*Karolina Kauppi, Ph.D., et al.*

**COMUNICADOS Y ACTUALIZACIONES**

**CARTAS AL EDITOR**

**683 Comentarios sobre la asociación de la anticoncepción hormonal a los intentos de suicidio y a los suicidios**

*Ivan Berlin, M.D., Ph.D., et al.*

**684 Aclarando los métodos y los resultados en estudios de la asociación entre la anticoncepción hormonal y temas de salud mental: Respuesta a Berlin et al.**

*Charlotte Wessel Skovlund, Ph.D.*

**684 ¿Se explicaría mejor la variación en metilación si se tuviera en cuenta el consumo de alcohol?**

*Robert A. Philibert, M.D., Ph.D., Steven R.H. Beach, Ph.D.*

**RESEÑAS BIBLIOGRÁFICAS**

**686 Blue Dreams: The Science and the Story of the Drugs That Changed Our Minds [Sueños azules: La ciencia y la historia de los medicamentos que cambiaron nuestras mentes]**

*A. John Rush, M.D.*

**687 Interpersonal Psychotherapy for Posttraumatic Stress Disorder [Psicoterapia interpersonal para el trastorno de estrés postraumático]**

*Joel Yager, M.D.*

**688 The Addiction Solution: Treating Our Dependence on Opioids and Other Drugs [La solución de la adicción: Tratar nuestra dependencia de los opiáceos y otras drogas]**

*Andrew J. Saxon, M.D.*

**ACTOS OFICIALES**

**690 Informes a los socios**

**OTROS TEMAS DE INTERÉS**

**685 [Corrections]**

**703 Educación Médica Continuada**

**Cubierta:** [Dr. Allan McLane Hamilton, grandson of Alexander Hamilton, achieved professional renown of his own in the fields of neurology and forensic psychiatry. His life is highlighted in this issue's Images in Psychiatry (p. 605). {Credits: Everett Historical (Alexander Hamilton, 1755–1804, engraving 1859) and Amesto, Shutterstock.com.}]

**La Tabla de Contenidos y resúmenes de Este Número Está Disponible en Español**

*[This issue's Table of Contents is available in Spanish]*

*(Abstracts are also available in Spanish)*

Translation presented in collaboration with the Office of Global Health,  
Rutgers-Robert Wood Johnson Medical School

Support for this effort provided by ACTA Colombia.

**Translation courtesy of**

**Sergi Casals, M.A.**, Garuna, Medellín, Colombia ([www.garunaeditors.com](http://www.garunaeditors.com))

**Carlos López Jaramillo, M.D., M.Sc., Ph.D.**, Universidad de Antioquia, Medellín, Colombia

**Javier I. Escobar, M.D., M.Sc.**, Rutgers-Robert Wood Johnson Medical School

**AUDIO** Highlighted in AJP Audio, a downloadable .mp3 file available at [ajp.psychiatryonline.org](http://ajp.psychiatryonline.org)

**EMC** A course covering the content of this article is available online for paid subscribers to the AJP CME Course program

**EDITORIAL** Discussed in one of the issue's editorials

**GUÍAS CLÍNICAS** Clinical Guidance provided on the English table of contents

**VIDEO** Highlighted online by Deputy Editor Daniel S. Pine, M.D.

## ¿Puede establecerse un marco para el uso seguro de la ketamina?

Robert Freedman, M.D., Alan S. Brown, M.D., Tyrone D. Cannon, Ph.D., Benjamin G. Druss, M.D., Felton J. Earls, M.D., Javier Escobar, M.D., Yasmin L. Hurd, Ph.D., David A. Lewis, M.D., Carlos López-Jaramillo, M.D., Joan Luby, M.D., Helen S. Mayberg, M.D., Terrie E. Moffitt, Ph.D., Maria Oquendo, M.D., Roy H. Perlis, M.D., Daniel S. Pine, M.D., A. John Rush, M.D., Carol A. Tamminga, M.D., Mauricio Tohen, M.D., Eduard Vieta, M.D., Katherine L. Wisner, M.D., Yu Xin, M.D.

Los científicos de la industria farmacéutica han emprendido estudios para apoyar la aprobación, para su uso clínico general, de la esketamina intranasal para pacientes con depresión mayor resistente al tratamiento o con tendencias suicidas agudas. Recientemente, Canuso et al realizaron un ensayo inicial de fase 2, aleatorizado y controlado con placebo, de la esketamina intranasal para el tratamiento de pacientes con tendencias suicidas agudas, que está publicado en el presente número del *American Journal of Psychiatry* (1). Los pacientes de dicho estudio, según consideraron sus autores, estaban en riesgo inminente de suicidio y debían ser hospitalizados. Aunque por lo general la ideación suicida disminuye transitoriamente después de las intervenciones por intento de suicidio o por suicidio inminente, muchos pacientes cometen otro intento en el transcurso del año siguiente. Por este motivo, se necesitan terapias más efectivas.

En el estudio de Canuso et al, la esketamina administrada por vía intranasal dos veces por semana administrada conjuntamente con antidepresivos en dosis óptimas redujo la ideación suicida y la depresión a las 4 y a las 24 horas, pero al final del tratamiento, después de 4 semanas, su efecto no fue superior al del placebo intranasal administrado con el tratamiento con antidepresivos. Estos efectos agudos de la esketamina intranasal son similares a los que se alcanzan con ketamina intravenosa (2).

Un ensayo de fase 2 es una etapa intermedia en el desarrollo farmacéutico. La fase 1 establece que se pueden administrar niveles adecuados del medicamento a sujetos sanos de forma segura. La fase 2 identifica un rango de pacientes adecuados, así como dosis seguras y efectivas para tratar sus afecciones. La fase 3, la fase final que culmina con la aprobación de la FDA para la comercialización del medicamento, después comprueba que el medicamento sea seguro y efectivo en grupos más grandes de pacientes. Una vez obtenida la aprobación, se obtienen resultados de mayor duración para la esketamina intranasal. Es posible que este tratamiento ayude a un número significativo de pacientes que no responden adecuadamente a terapias antidepresivas existentes.

La historia de la farmacología incluye muchos medicamentos que pueden salvar vidas. Sin embargo, también está repleta de ejemplos de medicamentos cuyo abuso ha sido

mayor que el efecto terapéutico previsto. El ejemplo más reciente es la oxycodona, que se desarrolló como una alternativa a los opiáceos antiguos de los que se abusaba y posteriormente se promovió intensamente para evitar que los pacientes sintieran dolor después de procedimientos médicos y odontológicos. El abuso de la oxycodona, con generalización tanto al fentanil como a la heroína, ha resultado en una epidemia nacional de muertes causadas por opiáceos. Las etapas del desarrollo de una epidemia están claras cuando se miran retrospectivamente. Para promocionar la oxycodona, la compañía farmacéutica dedicó grandes esfuerzos de mercadeo para advertir a los médicos, enfermeras, odontólogos y hospitales, que el dolor de los pacientes era un síntoma médico al que no se le estaba prestando atención. Finalmente, el mensaje a los proveedores de salud fue que recetaran el medicamento en una dosis y con una duración que fueran más que suficientes para evitar el dolor.

Pedirles a los pacientes que aguantaran cualquier tipo de dolor se consideraba una práctica que no cumplía con los mínimos de calidad. Rara vez se planteó la prevención del abuso como una preocupación, y cuando se convirtió en un problema, fue el médico el responsable de detectarlo y tratarlo. La propagación de la epidemia fue resultado de la distribución irresponsable de grandes cantidades de oxycodona, a menudo miles de recetas a farmacias particulares que atendían áreas en las que el desvío del medicamento para su abuso se había descontrolado. La actuación del Congreso estadounidense prohibió la regulación de este flujo de medicamentos, a pesar de las advertencias del Departamento de Justicia en 2003 (3).

La conducta de querer obtener ketamina ya se considera un tema clínico, ya que algunos pacientes acuden a las clínicas para obtener varias inyecciones para mejorar su estado de ánimo. Algunos pacientes utilizan la formulación intravenosa de forma intranasal repetidamente sin supervisión (4). La utilización de la ketamina para fines diferentes a la anestesia

**La protección de la salud del público también es parte de nuestra responsabilidad y, como médicos, somos responsables de prevenir nuevas epidemias de medicamentos.**

sia pediátrica y veterinaria, usos para los que actualmente está aprobada, ya es una realidad. Sin embargo, es responsabilidad de cada médico asesorar el uso adecuado y evitar la generación de dependencia y abuso. El consenso actual de la *American Psychiatric Association* (5) es un ejemplo “Considerando el conocido potencial de abuso de la ketamina y los recientes informes de abuso de ketamina prescrita para el tratamiento de la depresión, los clínicos deben estar atentos y asesorar el potencial que los pacientes tienen de desarrollar trastorno por consumo de ketamina”. La preocupación acerca de los efectos nocivos del abuso de ketamina es especialmente importante, puesto que la mayoría de los ensayos clínicos solamente han examinado la seguridad y la eficacia agudas. Canuso et al observaron una atenuación, a lo largo del tiempo, de la respuesta clínica específicamente a la ketamina; el hecho de no poder demostrar beneficios a más largo plazo cuestiona el riesgo versus el beneficio del consumo a largo plazo.

El derecho y la responsabilidad de los médicos de administrar la mejor atención a cada uno de sus pacientes es un principio fundamental de la ética de la atención sanitaria. Del mismo modo que se considera irresponsable pedirles a los pacientes que toleren el dolor, es igualmente irresponsable negarle a un paciente con tendencias suicidas la gama completa de intervenciones efectivas existentes. Ante una situación clínica difícil, los médicos pueden tomar la decisión de ignorar los límites recomendados en relación a la dosificación y frecuencia de un medicamento o a la duración del tratamiento con el mismo. Sin embargo, la protección de la salud del público también es parte de nuestra responsabilidad y, como médicos, somos responsables de prevenir nuevas epidemias de medicamentos. Ha quedado demostrado que el mandato de los médicos de prevenir el abuso es insuficiente como única medida de seguridad para evitar la epidemia de opiáceos, que ha causado mayor morbilidad y mortalidad que el dolor que estos medicamentos evitan después de un procedimiento médico. Paradójicamente, la metadona y la clozapina, medicamentos con un valor terapéutico único demostrado, están sujetas a restricciones legales muy estrictas en cuanto a su uso. Más que esperar hasta que la ketamina alcance un uso clínico generalizado para ver si se debería regular de forma similar, sería mejor que los médicos, las agencias reguladoras y la industria farmacéutica trabajaran unidos de manera preventiva para establecer un marco adecuado para su uso terapéutico.

La ketamina tiene un reconocido potencial de tolerancia y auto-administración en modelos animales de comportamiento adictivo (6). Para obtener la aprobación de la FDA para su comercialización, los ensayos de fase 3 deben incluir un monitoreo riguroso de las ansias de seguir consumiendo ketamina que sienten los pacientes después de su administración y un monitoreo de la orina antes de cada administración posterior, para detectar pruebas de que intentan conseguir la ketamina de otras fuentes. En los ensayos de fase 2 reportados hasta el momento no se ha hecho ningún seguimiento de este tipo. La incidencia de los primeros indi-

cios de abuso, aunque se espera que sean bajos dentro del marco de un ensayo clínico controlado, es un punto de partida necesario para después poder con el que se podrá comparar una administración menos controlada en la práctica clínica. Los ensayos de fase 3 también deben hacer seguimiento de los pacientes por lo menos durante 8 semanas después de la fase activa de administración del medicamento para detectar el posible inicio de una nueva conducta de conseguir la medicación.

Ya se ha demostrado que la administración de ketamina dos veces por semana es igual de efectiva que la administración más frecuente (5). Dado que la excreción urinaria de ketamina y su metabolito prácticamente se ha completado 48 horas después de la administración del medicamento, sería conveniente establecer un sistema similar al que actualmente se utiliza para el control que hacen los laboratorios de la neutropenia de la clozapina. En dicho sistema, para la prescripción y el despacho del medicamento se exigiría evidencia documentada por el laboratorio de un nivel de orina inferior a cierto umbral, establecido en los ensayos de fase 3, que indique que no ha habido abuso recientemente.

Un sistema similar al que se utiliza para la metadona ofrecería un nivel adicional de protección. Limitar su entrega a las farmacias de hospitales autorizadas para pacientes hospitalizados y a las clínicas autorizadas para los demás pacientes ayudaría a prevenir el abuso de la ketamina, favorecido por los médicos y las instalaciones incapaces de controlar su uso. En este modelo, la ketamina intranasal nunca se les daría a los pacientes fuera de la clínica; en lugar de eso, el medicamento permanecería en posesión del médico y solamente se administraría al paciente en la clínica como parte de la atención a pacientes con depresión severa. Un registro nacional permitiría a los médicos detectar a los pacientes que intentan obtener ketamina en diferentes fuentes y también podría servir como base para la investigación sobre la evaluación de la efectividad (7).

Los colegas de la medicina de urgencias, que en cierto momento fueron los que más frecuentemente recetaron oxycodona, han creado programas que han reducido su uso de manera significativa. Su actual declaración sobre el uso de la ketamina no hace referencia a su uso para tendencias suicidas (8). Sería oportuno que los psiquiatras de urgencias ayudaran a determinar hasta qué punto, si es posible, la ketamina debería usarse para pacientes con tendencias suicidas para que pudieran ser dados de alta directamente de urgencias y recibir tratamiento ambulatorio, o si los pacientes para los que se justifica el tratamiento con ketamina, debido a sus tendencias suicidas, también deben ser hospitalizados y recibir tratamiento en el hospital. Dentro del grupo de los pacientes con suicidio, las mujeres jóvenes pobres, que posiblemente no pueden permitirse continuar el tratamiento de salud mental, están representadas de manera desproporcionada. El uso no aprobado (*off-label*) de la ketamina en adolescentes debería ser restringido hasta que se tengan datos adecuados sobre los efectos del medicamento en el desarrollo, incluyendo el desarrollo de la conducta adictiva. Muchos

pacientes deprimidos resistentes al tratamiento ya están abusando de sustancias que pueden interactuar con la ketamina, incluyendo estimulantes, opiáceos y alcohol. Dichos pacientes fueron excluidos del ensayo de Canuso et al. Sin embargo, es preciso evaluar los potenciales efectos adictivos que pueden interactuar con la ketamina.

La FDA y las compañías farmacéuticas que comercializan la ketamina tienen la capacidad primaria de controlar cómo se distribuye el medicamento y en qué circunstancias se puede usar, pero la información que pueden aportar los psiquiatras y otros grupos profesionales interesados, y los Centros de Prevención y Control de Enfermedades y el Instituto Estadounidense de Abuso de Drogas, debería informar el desarrollo de controles efectivos. La educación del público y de los médicos debe equilibrar los beneficios como los riesgos del abuso. Debido a la distribución mundial de productos farmacéuticos, la coordinación con agencias reguladoras de otros países es clave para evitar el desvío a nivel global. Estos pasos, implementados desde temprano en el desarrollo de la ketamina y otros medicamentos cuyo potencial terapéutico es complicado por su potencial de abuso, no tendrían como objetivo negarles ayuda terapéutica a los pacientes que la necesitan de manera significativa. Todo lo contrario, el objetivo es determinar el riesgo de abuso y el marco en el que ese tratamiento continuará estando disponible para aquellos que lo necesiten, al mismo tiempo que se protege a la población en riesgo de abuso de una epidemia de mal uso de la ketamina.

## INFORMACIÓN DEL ARTÍCULO Y LOS AUTORES

Los autores son miembros del Comité Editorial de la revista.

Dirigir la correspondencia al Dr. Freedman (ajp@psych.org).

Aceptado en marzo de 2018.

*Am J Psychiatry* 2018; 175:1–3; doi: 10.1176/appi.ajp.2018.18030290

## REFERENCIAS

1. Canuso CM, Singh JB, Fedgchin M, et al: Efficacy and safety of intranasal esketamine for the rapid reduction of symptoms of depression and suicidality in patients at imminent risk for suicide: results of a double-blind, randomized, placebo-controlled study. *Am J Psychiatry* 2018; 175:620–630
2. Grunebaum MF, Galfalvy HC, Choo TH, et al: Ketamine for rapid reduction of suicidal thoughts in major depression: a midazolam-controlled randomized clinical trial. *Am J Psychiatry* 2018; 175:327–335
3. National Drug Intelligence Center: West Virginia drug threat assessment: diverted pharmaceuticals. Aug 2003. <https://www.justice.gov/archive/ndic/pubs5/5266/index.htm>
4. Schak KM, Vande Voort JL, Johnson EK, et al: Potential risks of poorly monitored ketamine use in depression treatment. *Am J Psychiatry* 2016; 173:215–218
5. Sanacora G, Frye MA, McDonald W, et al: A consensus statement on the use of ketamine in the treatment of mood disorders. *JAMA Psychiatry* 2017; 74:399–405
6. Rocha BA, Ward AS, Egilmez Y, et al: Tolerance to the discriminative stimulus and reinforcing effects of ketamine. *Behav Pharmacol* 1996; 7:160–168
7. Aaronson ST, Sears P, Ruvuna F, et al: A 5-year observational study of patients with treatment-resistant depression treated with vagus nerve stimulation or treatment as usual: comparison of response, remission, and suicidality. *Am J Psychiatry* 2017; 174: 640–648
8. Nazarian DJ, Broder JS, Thiessen MEW, et al: Clinical policy: critical issues in the diagnosis and management of the adult psychiatric patient in the emergency department. *Ann Emerg Med* 2017; 69: 480–498

## Prevención primaria prenatal de la enfermedad mental por medio de suplementos de micronutrientes en el embarazo

Robert Freedman, M.D., Sharon K. Hunter, Ph.D., M. Camille Hoffman, M.D.

Los genes, las infecciones, la desnutrición y otros factores que afectan el desarrollo cerebral son un componente principal de riesgo para el desarrollo emocional del niño y posteriores enfermedades mentales, incluyendo la esquizofrenia, el trastorno bipolar y el autismo. Todavía no se han establecido las intervenciones prenatales para mejorar ese riesgo. Se llevó a cabo una revisión sistemática de los nutrientes prenatales y el desarrollo emocional infantil y posteriores enfermedades mentales. Ensayos aleatorizados de ácido fólico, fosfatidilcolina y suplementos de ácidos grasos omega-3 evalúan los efectos de dosis más altas que las adecuadas para subsanar las deficiencias, con el fin de promover el desarrollo fetal normal a pesar de los riesgos genéticos y del entorno. El ácido fólico para prevenir defectos en el tubo neural es un ejemplo. Actualmente se recomienda vitamina A y D en niveles máximos, pero la adherencia incompleta al tratamiento por parte de las mujeres permite llevar a cabo estudios observacionales de sus efectos. El ácido fólico y los suplementos de fosfatidilcolina han mostrado evidencia de

mejorar el desarrollo emocional en la infancia asociado a la enfermedad mental posterior. Las vitaminas A y D disminuyeron el riesgo de esquizofrenia y autismo en las observaciones retrospectivas. La suplementación de ácidos grasos omega-3 durante el embarazo temprano aumentó el riesgo de esquizofrenia y aumentó los síntomas de trastorno por déficit de atención e hiperactividad, pero más adelante en el embarazo disminuyó la sibilancia pulmonar en la infancia y el nacimiento prematuro. Los estudios resultan complicados por el tiempo que transcurre entre el nacimiento y la aparición de enfermedades mentales como la esquizofrenia, en comparación con anomalías como hendiduras faciales al nacer. Como parte de la atención materna y fetal integral, las intervenciones con nutrientes prenatales deberían considerarse como primeros pasos especialmente efectivos para reducir el riesgo de futuras enfermedades psiquiátricas o de otro tipo en recién nacidos.

*(Am J Psychiatry 2018; 175:607–619)*

## Eficacia y seguridad de la esketamina intranasal para la reducción rápida de síntomas de depresión y tendencias suicidas en pacientes en riesgo inminente de suicidio: Resultados de un estudio doble ciego, aleatorizado y controlado con placebo

Carla M. Canuso, M.D., Jaskaran B. Singh, M.D., Maggie Fedgchin, Pharm.D., Larry Alphas, M.D., Ph.D., Rosanne Lane, M.A.S., Pilar Lim, Ph.D., Christine Pinter, M.S., David Hough, M.D., Gerard Sanacora, M.D., Ph.D., Husseini Manji, M.D., Wayne C. Drevets, M.D.

**Objetivo:** Los autores compararon la eficacia del tratamiento estándar de atención más esketamina intranasal o placebo para la reducción rápida de síntomas de depresión mayor, incluyendo las tendencias suicidas, en individuos con riesgo inminente de suicidio.

**Método:** En un estudio doble ciego, multicéntrico y de prueba de concepto, 68 participantes fueron asignados aleatoriamente para recibir esketamina (84 mg) o placebo dos veces por semana durante 4 semanas, además del tratamiento estándar de atención integral. La meta primaria de eficacia fue el cambio en la puntuación de la Escala de Evaluación de Depresión de Montgomery-Åsberg (MADRS) en las 4 horas posteriores al inicio del estudio, después de la dosis inicial. También se evaluó el juicio global del clínico sobre el riesgo de suicidio (con la herramienta de ideación suicida y evaluación del comportamiento, *Suicide Ideation and Behavior Assessment Tool*). Las metas secundarias incluyeron las mismas medidas a las 24 horas y una valoración doble-ciega a los 25 días.

**Resultados:** Se obtuvo una mejora significativamente mayor en la puntuación de la escala MADRS a las 4 horas (diferencia de medias de mínimos cuadrados=-5,3; SE=2,10; tamaño de efecto=0,61) y a las ~24 horas (diferencia de medias de mínimos

cuadrados=-7,2; SE=2,85; tamaño de efecto=0,65), pero no a los 25 días (diferencia de medias de mínimos cuadrados=-4,5; SE=3,14; tamaño de efecto=0,35). En el grupo de esketamina, también se observó una mejoría significativamente mayor en la puntuación del ítem acerca de los pensamientos suicidas de la escala MADRS a las 4 horas (tamaño de efecto=0,7), pero no a las 24 horas (tamaño de efecto=0,35) ni a los 25 días (tamaño de efecto=0,29). Las reducciones entre grupos en las puntuaciones del juicio global del clínico sobre el riesgo de suicidio no fueron estadísticamente diferentes en ningún momento. Los eventos adversos más comunes entre los participantes en el grupo de esketamina fueron náuseas, mareo, disociación, sabor desagradable y dolor de cabeza.

**Conclusiones:** Estos hallazgos preliminares indican que, en comparación con el placebo, la esketamina intranasal que se adiciona al tratamiento estándar de atención integral puede resultar en una mejora significativamente rápida de los síntomas depresivos, incluyendo algunas medidas de ideación suicida, en pacientes deprimidos con riesgo inminente de suicidio.

(*Am J Psychiatry* 2018; 175:620-630)



## Actividad física y depresión incidente: Un meta-análisis de estudios de cohorte prospectivos

Felipe B. Schuch, Ph.D., Davy Vancampfort, Ph.D., Joseph Firth, Ph.D., Simon Rosenbaum, Ph.D., Philip B. Ward, Ph.D., Edson S. Silva, B.Sc., Mats Hallgren, Ph.D., Antonio Ponce De Leon, Ph.D., Andrea L. Dunn, Ph.D., Andrea C. Deslandes, Ph.D., Marcelo P. Fleck, Ph.D., Andre F. Carvalho, Ph.D., Brendon Stubbs, Ph.D.

**Objetivo:** Los autores examinaron la relación prospectiva entre la actividad física y la depresión incidente y exploraron potenciales moderadores.

**Método:** Se buscaron estudios de cohorte prospectivos que evaluaran la depresión incidente en *PubMed*, *PsycINFO*, *Embase* y *SPORTDiscus*, desde el inicio de estas bases de datos hasta el 18 de octubre de 2017. Se extrajeron datos demográficos y clínicos, datos sobre evaluaciones de la depresión y la actividad física y razones de momios (*odds ratios*), riesgos relativos y cocientes de riesgos (*hazard ratios*) con intervalos de confianza del 95%. Se realizaron meta-análisis de efectos aleatorios y se exploraron las potenciales fuentes de heterogeneidad. La calidad metodológica se evaluó con la Escala Newcastle-Ottawa.

**Resultados:** Se hizo seguimiento de un total de 49 estudios prospectivos únicos (N=266.939; proporción media de sexo masculino en los estudios, 47%) por 1.837.794 años-persona. En comparación con las personas con niveles bajos de actividad física, aquellos con niveles altos tuvieron menos probabilidades de desarrollar depresión (*odds ratios* ajustado=0,83; IC 95%=0,79 a 0,88; I<sup>2</sup>=0,00). Además, la actividad física tuvo un efecto protector contra la aparición de la depresión en los

jóvenes (*odds ratios* ajustado=0,90; IC 95%=0,83 a 0,98), en adultos (*odds ratios* ajustado=0,78; IC 95%=0,70 a 0,87) y en adultos mayores (*odds ratios* ajustado=0,79; IC 95%=0,72 a 0,86). Se encontraron efectos protectores contra la depresión en todas las regiones geográficas, con *odds ratios* ajustados desde 0,65 a 0,84 en Asia, Europa, Norte América y Oceanía, y contra la incidencia aumentada de tamizaje positivo para los síntomas depresivos (*odds ratios* ajustado =0,84; IC 95%=0,79 a 0,89) o diagnóstico de depresión mayor (*odds ratios* ajustado=0,86; IC 95%=0,75 a 0,98). No se identificó ningún moderador. Los resultados fueron consistentes para los *odds ratios* no ajustados y para los riesgos relativos/cocientes de riesgos no ajustados. La calidad general del estudio fue entre moderada y alta (puntuación en la Escala Newcastle-Ottawa, 6.3). Aunque se encontró un sesgo de publicación significativo, al ajustarlo no cambió la magnitud de las asociaciones.

**Conclusiones:** La evidencia disponible apoya la noción de que la actividad física puede proteger del desarrollo de la depresión, independientemente de la edad y de la región geográfica.

(*Am J Psychiatry* 2018; 175:631–648)



## Un estudio de gemelos de la personalidad no patológica y de los conteos del criterio de trastorno de personalidad del DSM-IV: Evidencia de influencias genéticas separadas

Nikolai Czajkowski, Ph.D., Steven H. Aggen, Ph.D., Robert F. Krueger, Ph.D., Kenneth S. Kendler, M.D., Michael C. Neale, Ph.D., Gun Peggy Knudsen, Ph.D., Nathan A. Gillespie, Ph.D., Espen Røysamb, Ph.D., Kristian Tambs, Ph.D., Ted Reichborn-Kjennerud, M.D., Ph.D.

**Objetivo:** Se ha encontrado que tanto la personalidad normativa como el trastorno de personalidad del DSM-IV son heredables. Sin embargo, se tiene conocimiento limitado de hasta qué punto las influencias genéticas y del entorno subyacentes a los trastornos de personalidad del DSM-IV son las mismas que las de la personalidad normativa. Los objetivos del presente estudio fueron evaluar la similitud fenotípica entre la personalidad normativa y la patológica e investigar hasta qué punto las influencias genéticas y del entorno que subyacen a las diferencias en la personalidad normativa también explican la variación de los síntomas en los diferentes trastornos de personalidad del DSM-IV.

**Método:** Se evaluó una muestra grande basada en la población de gemelos adultos para los criterios del trastorno de personalidad del DSM-IV, con entrevistas estructuradas en dos fases, cubriendo un intervalo de 10 años. En la segunda evaluación, los participantes también completaron el Inventario de los Cinco Grandes (*Big Five Inventory*, BFI), un instrumento de auto-reporte para evaluar el modelo de cinco factores de la personalidad normativa. La proporción de vulnerabilidades genéticas y del entorno específicas en las medidas del trastorno de personalidad individual, y por lo tanto no compartidas con los dominios del Inventario de los Cinco

Grandes, se estimaron por medio de descomposiciones de Cholesky multivariadas de pares de gemelos.

**Resultados:** El porcentaje medio de influencia genética en los 10 trastornos de personalidad del DSM-IV, evaluada en la primera fase y no compartida por los dominios de los Cinco Grandes fue 64%, mientras que para los seis trastornos de personalidad que se evaluaron simultáneamente en la fase 2, la mediana fue 39%. En contraste, las proporciones medias de influencia única del entorno en los trastornos de personalidad para las fases 1 y 2 fueron 97% y 96% respectivamente.

**Conclusiones:** Los resultados indican que una proporción entre moderada y considerable de la influencia genética que subyace a los trastornos de personalidad del DSM-IV no es compartida con los constructos de los dominios del modelo de personalidad no patológica de los Cinco Grandes. Es necesario tener precaución cuando se asume que las medidas de personalidad no patológica pueden ser indicadores de los trastornos de personalidad del DSM-IV al investigar la etiología de dichos trastornos.

(*Am J Psychiatry* 2018; 175:649–656)

# Sensibilización de la red neural de relevancia a estímulos emocionales repetidos después de la habituación inicial en pacientes con trastorno límite de la personalidad

Bryan T. Denny, Ph.D., Jin Fan, Ph.D., Samuel Fels, B.A., Hayley Galitzer, B.A., Daniela Schiller, Ph.D., Harold W. Koenigsberg, M.D.

**Objetivo:** El trastorno límite de la personalidad es el trastorno prototípico de reacción y desregulación emocionales, pero la comprensión de sus correlatos neurocognitivos sigue siendo limitada. Dos mecanismos que pueden subyacer a la reacción anómala como respuesta a estímulos negativos en los pacientes con trastorno límite de la personalidad son la deficiencia en la habituación y la sensibilización exagerada de la actividad en la red neural de relevancia, incluyendo la amígdala, la ínsula anterior y la corteza cingulada anterior dorsal. El objetivo de los autores fue revelar el mecanismo más plausible, examinando el efecto de la exposición repetida a imágenes emocionales tanto en una misma sesión de estudio como en diferentes sesiones.

**Método:** En los análisis del estudio se incluyeron un total de 75 participantes (pacientes con trastorno límite de la personalidad, N=26; pacientes con trastorno de la personalidad por evitación incluidos como grupo control psicopatológico, N=25; y sujetos sanos de control, N=24). A todos los participantes se les presentó cinco veces la misma serie de imágenes negativas y neutras en cada una de dos sesiones, con aproximadamente 3 días de diferencia, y durante las sesiones se recogían datos de IRM funcional. La actividad de la red de relevancia, medida por la señal de contraste depen-

diente del nivel de oxígeno en la sangre en regiones de interés definidas anatómicamente en la red de relevancia, de los tres grupos se comparó, para cada presentación en cada una de las dos sesiones de estudio. Se midió el afecto negativo auto-reportado para cada ensayo.

**Resultados:** La actividad de la red de relevancia mostró un efecto principal en la habituación dentro de la misma sesión en todos los grupos y sesiones. Sin embargo, hubo interacción grupo-sesión, de manera que solamente los pacientes con trastorno límite de la personalidad mostraron un aumento de la actividad de la red de relevancia como respuesta a las imágenes que re-encontraron en la segunda sesión, y este aumento de la sensibilización de la red de relevancia predijo mayor sensibilización en el afecto negativo auto-reportado.

**Conclusiones:** Estos resultados revelan los mecanismos neurales a través de los cuales los pacientes con trastorno límite de la personalidad consideran exageradamente relevantes las situaciones sociales negativas, y sugieren potenciales objetivos de intervención neurocognitiva.

(*Am J Psychiatry* 2018; 175:657–664)

# Tratamiento asistido con medicamentos para adultos dependientes del alcohol con enfermedades mentales graves e involucrados en la justicia penal: Efectos en la utilización y los resultados del tratamiento

Allison G. Robertson, Ph.D., M.P.H., Michele M. Easter, Ph.D., HsiuJu Lin, Ph.D., Linda K. Frisman, Ph.D., Jeffrey W. Swanson, Ph.D., Marvin S. Swartz, M.D

**Objetivo:** Los adultos con enfermedades mentales graves y dependencia comórbida del alcohol tienen un alto riesgo tanto de alta utilización de los servicios de salud con motivo de crisis, como de implicación en la justicia penal. El tratamiento asistido con medicación (MAT, por sus siglas en inglés) basado en la evidencia para la dependencia del alcohol puede reducir tanto la utilización del servicio de crisis como la reincidencia delictiva. Los autores estimaron los efectos del MAT en la utilización del tratamiento de salud comportamental.

**Método:** Se fusionaron datos administrativos relevantes de varias agencias públicas en Connecticut para 5.743 adultos de como mínimo 18 años que tuvieran un trastorno del espectro de la esquizofrenia, trastorno bipolar o trastorno de depresión mayor comórbido con dependencia del alcohol entre moderada y severa y que hubieron estado encarcelados por lo menos una noche durante el período del estudio (2002–2009). Se utilizaron modelos longitudinales de regresión multivariables para estimar el efecto del MAT, en comparación con otros tratamientos ambulatorios para la salud mental sobre el abuso de sustancias, las hospitalizaciones por abuso de sustancias, las visitas a urgencias, las condenas

penales y los encarcelamientos de pacientes hospitalizados.

**Resultados:** El MAT estuvo asociado a mejoras significativas en los resultados clínicos de los 12 meses después del inicio, en contraste con tratamientos de comparación — no asistidos con medicamentos—, incluyendo una mayor reducción tanto de hospitalizaciones por salud mental como de consultas en urgencias, y mayores mejoras en la adherencia a los medicamentos psicotrópicos. No se encontraron beneficios del MAT para la mayoría de los resultados en justicia penal, excepto por reducciones significativas de condenas por delito en adultos con trastorno bipolar.

**Conclusiones:** El MAT está infrautilizado para tratar la dependencia del alcohol, especialmente en adultos con enfermedades mentales graves. Estos resultados sugieren que el MAT puede tener beneficios importantes para los resultados clínicos en esta población. Se necesita más investigación para mejorar su uso en esta población de pacientes y para sortear las barreras al tratamiento

*(Am J Psychiatry 2018; 175:665–673)*

## Revisión de las acciones de los medicamentos antipsicóticos a través de redes de genes asociados con la esquizofrenia

Krolina Kauppi, Ph.D., Sara Brin Rosenthal, Ph.D., Min-Tzu Lo, Ph.D., Nilotpal Sanyal, Ph.D., Mian Jiang, B.S., Ruben Abagyan, Ph.D., Linda K. McEvoy, Ph.D., Ole A. Andreassen, M.D., Ph.D., Chi-Hua Chen, Ph.D.,

**Objetivo:** Los medicamentos antipsicóticos fueron descubiertos accidentalmente en la década de 1950, pero su mecanismo de acción todavía no se comprende. Una mejor comprensión de la patogénesis de la esquizofrenia podría esclarecer cuáles son las acciones de los medicamentos actuales y revelar nuevas vías “medicables” para necesidades terapéuticas no identificadas. Estudios recientes de asociación del genoma completo ofrecen oportunidades sin precedentes de caracterizar redes de genes de la enfermedad y descubrir relaciones entre genes y enfermedad. Se ha demostrado el solapamiento poligénico entre genes de riesgo de esquizofrenia y los objetivos de la medicación antipsicótica, pero no se han determinado ni las vías ni los genes específicos que constituyen dicho solapamiento. Los genes de riesgo de trastornos poligénicos no operan aislados, sino en combinación con otros genes a través de interacciones proteína-proteína en el producto del gen.

**Método:** Se utilizó el interactoma de la proteína para asociar los objetivos de los medicamentos antipsicóticos (N=88) a redes de genes de riesgo de esquizofrenia (N=328).

**Resultados:** Los genes de riesgo de esquizofrenia se locali-

zaron de forma significativa en el interactoma, formando un claro módulo de enfermedad. Los genes esenciales del módulo fueron enriquecidos para genes involucrados en la cognición y la biología del desarrollo, lo que puede tener un papel central en la etiología de la esquizofrenia. Los objetivos de los medicamentos antipsicóticos se solaparon con el módulo de la enfermedad y comprendieron múltiples vías más allá de la dopamina. Algunos genes de riesgo importantes como las familias CHRN, PCDH y HCN no estuvieron conectados a antipsicóticos existentes pero pueden ser objetivos adecuados para nuevos medicamentos u oportunidades de re-definir el propósito de los medicamentos para tratar otros aspectos de la esquizofrenia, como los síntomas negativos o cognitivos.

**Conclusiones:** El enfoque de la medicina de redes ofrece una plataforma para reunir información de la genética de la enfermedad y las interacciones medicamento-gen para que el tema principal ya no sea el desarrollo de antipsicóticos, sino de medicamentos anti-esquizofrenia con múltiples objetivos. Este enfoque se puede transferir a otras enfermedades.

(*Am J Psychiatry* 2018; 175:674–682)
