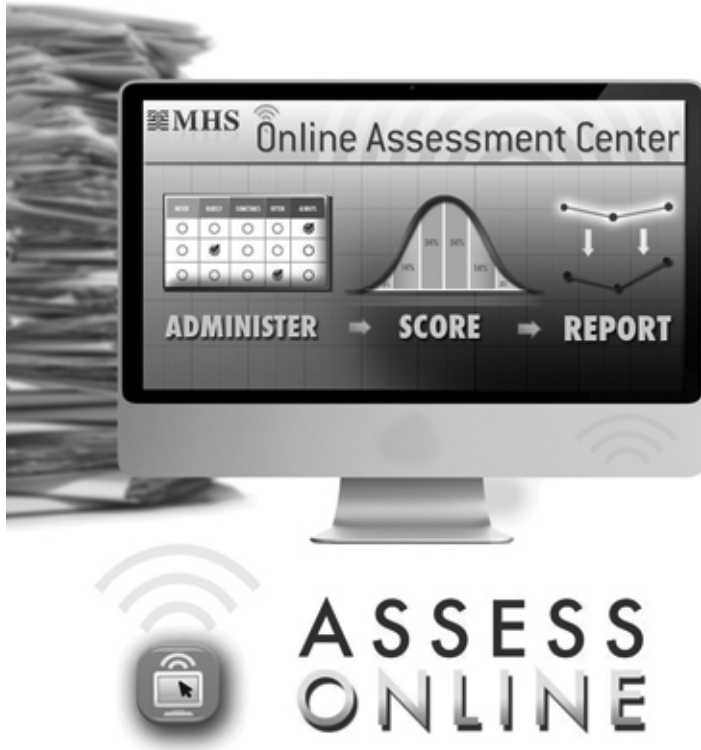

**Access a wide range of MHS Assessments on a secure, easy to use website.**

**Time to Assess and Score**

| Method    | Time           |
|-----------|----------------|
| Handscore | 8 hrs & 20 min |
| Software  | 2 hrs & 5 min  |
| Online    | Only 25 min    |

- Administration and scoring time to complete 25 Connors 3™ Parent or Teacher Forms.

**The MHS Online Assessment Center** provides busy professionals the ability to administer, score and generate reports on a wide range of MHS assessments, with just a click of a button.

All you need to get started is access to a computer, tablet, or smartphone with the internet. Generate full reports without delay through automated scoring with no data entry or software uploads.

This means more time with your clients and less time waiting for information to be entered.

- Safe & Secure**  
 Meets and exceeds HIPPA, FERPA, and PIPEDA requirements.
- Save Time**  
 Fast, easy, and accurate administration with automated scoring.
- Tailored Organization**  
 Data can be customized to how you work.

**MHS**  
ASSESSMENTS

USA Tel: 1.800.456.3003 / CAN Tel: 1.800.268.6011  
 mhs.com • customerservice@mhs.com

**FREE TRIAL** Sign up at  
[MHS.com/onlineassessments](http://MHS.com/onlineassessments)

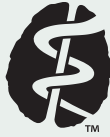

# The American Journal of Psychiatry

Official Journal of the American Psychiatric Association

## Officers 2018–2019

### President

Altha J. Stewart, M.D.

### President-Elect

Bruce J. Schwartz, M.D.

### Treasurer

Gregory W. Dalack, M.D.

### Secretary

Philip R. Muskin, M.D., M.A.

### Assembly

#### Speaker

James R. Batterson, M.D.

#### Speaker-Elect

Paul O'Leary, M.D.

#### Recorder

Seeth Vivek, M.D.

### Office of the CEO and Medical Director

#### CEO and Medical Director

Saul Levin, M.D., M.P.A., F.R.C.P.-E.

### Board of Trustees

Renée L. Binder, M.D.

Jenny Boyer, M.D., Ph.D., J.D.

Rana Elmaghraby, M.D.

Tanuja Gandhi, M.D.

Ayana Jordan, M.D., Ph.D.

Annette M. Matthews, M.D.

Maria A. Oquendo, M.D., Ph.D.

Roger Peele, M.D.

Vivian B. Pender, M.D.

Eric M. Plakun, M.D.

Richard F. Summers, M.D.

Ramaswamy Viswanathan, M.D., D.M.Sc.

Cheryl D. Wills, M.D.

Melinda Young, M.D.

## Editorial Board

### Editor

Robert Freedman, M.D.

### Deputy Editors

David A. Lewis, M.D.

Robert Michels, M.D.

Daniel S. Pine, M.D.

A. John Rush, M.D.

Susan K. Schultz, M.D.

Carol A. Tamminga, M.D.

### Associate Editors

Alan Brown, M.D., M.P.H.

Tyrone Cannon, Ph.D.

Benjamin G. Druss, M.D., M.P.H.

Felton Earls, M.D.

Graham J. Emslie, M.D.

Javier I. Escobar, M.D., M.Sc.

Yasmin Hurd, Ph.D.

Carlos López Jaramillo, M.D., M.Sc.,  
Ph.D.

Joan L. Luby, M.D.

Constantine G. Lyketsos, M.D., M.H.S.

Helen S. Mayberg, M.D., F.R.C.P.C.

Terrie E. Moffitt, Ph.D.

Rajesh Narendran, M.D.

Roy Perlis, M.D.

Anita Thapar, M.B.B.Ch., F.R.C.Psych.,  
Ph.D., F.Med.Sci.

Mauricio Tohen, M.D., Dr.PH., M.B.A.

Eduard Vieta, M.D., Ph.D.

John T. Walkup, M.D.

Katherine L. Wisner, M.D., M.S.

Xin Yu, M.D.

### Editor Emerita

Nancy C. Andreasen, M.D., Ph.D.

### Former Editors

Amariah Brigham, M.D., 1844–1849

T. Romeyn Beck, M.D., 1849–1854

John P. Gray, M.D., 1854–1886

G. Alder Blumer, M.D., 1886–1894

Richard Dewey, M.D., 1894–1897

Henry M. Hurd, M.D., 1897–1904

Edward N. Brush, M.D., 1904–1931

Clarence B. Farrar, M.D., 1931–1965

Francis J. Braceland, M.D., 1965–1978

John C. Nemiah, M.D., 1978–1993

### Editorial Staff

#### Executive Editor

Michael D. Roy

#### Senior Editor

John J. Guardiano, Ph.D.

#### Production Manager

Susan Westrate

#### Assistant Editor

Angela Moore

#### Online Content Manager

Michael Pogachar

#### Editorial Support Services Manager

Heidi Koch

#### Editorial Assistant

Linda LaCour

#### Editorial Assistant/ Permissions Coordinator

Efrem Tuquabo

#### Spanish Content Manager

Sergi Casals, M.A.

#### Assistants to the Editors

Lois Lilienthal

Laura English

Rachel Hogg

Russell A. Scholl

### Publisher

John McDuffie

**Columbia University**  
**College of Physicians and Surgeons**  
**Department of Psychiatry**

F/T Positions available for MD's in an Inpatient setting within the psychiatry service. **Assistant Professor or Instructor Level.**

**Assistant professor** requires board certification in psychiatry and 2-3 years post-residency clinical experience.

**Instructor level** requires graduation from a psychiatric residency program. Interest in Community Psychiatry and dual diagnosis preferred.

Opportunities for professional development in an academic medical center. Direct patient care, team leader, teaching Columbia Medical students; Bilingual English/Spanish preferred but not essential. Must have NYS license and DEA certificate. Columbia is Affirmative Action /Equal Opportunity Employer.

**Please apply:**

<https://academicjobs.columbia.edu/applicants/entralf?quickFind=66388>

**Office-Based Buprenorphine Treatment of Opioid Use Disorder, Second Edition**

*Edited by John A. Renner Jr., M.D.,  
 Petros Levounis, M.D., M.A., and  
 Anna T. LaRose, M.D.*

This new edition of *Office-Based Buprenorphine Treatment* has been updated to reflect DSM-5 language, and two additional chapters have been included: one that addresses other pharmacotherapies useful in treating OUD, including methadone and naltrexone, and another that discusses OUD treatment specifically with regard to women's health and pregnancy.

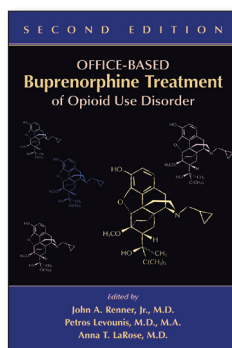

2018 • 395 pages • ISBN 978-1-61537-083-2 • Paperback • \$79.00 • Item #37083  
 2018 • 395 pages • ISBN 978-1-61537-170-9 • eBook • \$63.00 • Item #37170

AMERICAN  
**PSYCHIATRIC**  
 ASSOCIATION  
**PUBLISHING**

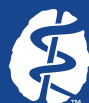

Order @ [www.appi.org](http://www.appi.org)  
 Email: [appi@psych.org](mailto:appi@psych.org)  
 Phone: 1-800-368-5777

AH1813A

**JUST PUBLISHED!**

**Competency in Combining Pharmacotherapy and Psychotherapy Integrated and Split Treatment, Second Edition**

**Core Competencies in Psychotherapy**

*Michelle B. Riba, M.D., M.S., Richard Balon, M.D., and Laura Weiss Roberts, M.D., M.A.*

*Series Editor: Glen O. Gabbard, M.D.*

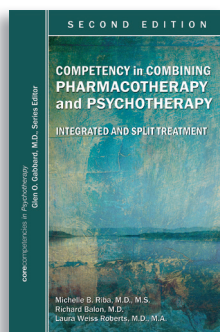

This book is designed to help psychiatrists at any stage of their career achieve competency in combining and coordinating pharmacotherapeutic and psychotherapeutic treatments for the benefit of their patients.

This second edition, addresses both integrated (single clinician) and split/collaborative (multiple clinicians) treatments, discussing for each:

- The selection of medication and psychotherapy
- The patient evaluation and opening
- Sequencing
- Evaluating, monitoring, and supervising treatment
- Terminating and transitioning patient care

The book also offers a chapter—new to this second edition—that focuses on primary care access for mental health services in the context of integrated and split/collaborative care.

2018 • 175 pages • ISBN 978-1-61537-066-5 • Paperback • \$65.00 • Item #37066  
 2018 • 175 pages • ISBN 978-1-61537-180-8 • eBook • \$52.00 • Item #37180

**20% Discount for American Psychiatric Association Members**  
**25% Discount for APA Resident-Fellow Members**

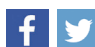

AMERICAN  
**PSYCHIATRIC**  
 ASSOCIATION  
**PUBLISHING**

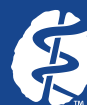

Order @ [www.appi.org](http://www.appi.org)  
 Email: [appi@psych.org](mailto:appi@psych.org)  
 Phone: 1-800-368-5777  
 Priority Code AH1805A

## PERSPECTIVES

---

### EDITORIALS

**587 Can a Framework Be Established for the Safe Use of Ketamine?**

*Robert Freedman, M.D., et al.* [AUDIO](#)

**590 Can Personality Disorders Be Redefined in Personality Trait Terms?**

*Andrew E. Skodol, M.D.*

**593 Abnormal Sensitization of Neural and Behavioral Responses to Socially Relevant Images in Individuals With Borderline Personality Disorder: Implications for Guiding More Effective Targeting of Treatments**

*Mary L. Phillips, M.D.*

**596 Medication-Assisted Treatment for Alcohol Use Disorder: Hope for Incarcerated Patients and for Our Communities**

*Alexandra Aaronson, M.D., et al.*

### TREATMENT IN PSYCHIATRY

**598 Antidepressant-Resistant Depression in Patients With Comorbid Subclinical Hypothyroidism or High-Normal TSH Levels**

*Bruce M. Cohen, M.D., Ph.D., et al.* [CME](#) • [AUDIO](#)

### IMAGES IN PSYCHIATRY

**605 Allan McLane Hamilton**

*Jonathan Davidson, M.B.B.S., F.R.C.Psych.*

### REVIEWS AND OVERVIEWS

**607 Prenatal Primary Prevention of Mental Illness by Micronutrient Supplements in Pregnancy**

*Robert Freedman, M.D., et al.* [AUDIO](#) • [VIDEO](#)

This review summarizes recent studies on the fetal origins of illness and puts forward evidence regarding beneficial effects of maternal micronutrient supplementation during pregnancy.

## NEW RESEARCH

---

### ARTICLES

**620 Efficacy and Safety of Intranasal Esketamine for the Rapid Reduction of Symptoms of Depression and Suicidality in Patients at Imminent Risk for Suicide: Results of a Double-Blind, Randomized, Placebo-Controlled Study**

*Carla M. Canuso, M.D., et al.* [EDITORIAL](#) • [AUDIO](#) • [VIDEO](#)

Relative to placebo, intranasal esketamine given in addition to comprehensive standard-of-care treatment may result in significantly rapid improvement in depressive symptoms, including some measures of suicidal ideation, among patients with major depression at imminent risk for suicide.

Articles, continued

**631 Physical Activity and Incident Depression: A Meta-Analysis of Prospective Cohort Studies**

*Felipe B. Schuch, Ph.D., et al.* CME • AUDIO

This meta-analysis reviews data on the relationship between physical activity and future risk for depression. Synthesizing data from 49 studies, the authors find that high levels of physical activity at one point in time predict a reduced risk for depression at a later point in time.

**649 A Twin Study of Normative Personality and DSM-IV Personality Disorder Criterion Counts: Evidence for Separate Genetic Influences**

*Nikolai Czajkowski, Ph.D., et al.* EDITORIAL

This research applies the twin study design to address questions relating to aspects of personality. The findings suggest that considerable discontinuities exist between the genetic influences underlying behaviors related to classic, normative models of personality compared with symptoms of personality disorders.

**657 Sensitization of the Neural Salience Network to Repeated Emotional Stimuli Following Initial Habituation in Patients With Borderline Personality Disorder**

*Bryan T. Denny, Ph.D., et al.* EDITORIAL

In patients with borderline personality disorder, abnormally increased reactivity in nodes in the salience network to re-encountered emotional images—a pattern not present among individuals with avoidant personality disorder—suggest a neural mechanism for borderline personality disorder and potential neurocognitive intervention targets.

**665 Medication-Assisted Treatment for Alcohol-Dependent Adults With Serious Mental Illness and Criminal Justice Involvement: Effects on Treatment Utilization and Outcomes**

*Allison G. Robertson, Ph.D., M.P.H., et al.* EDITORIAL • CME • AUDIO

Medication-assisted treatment reduced the rates of psychiatric hospitalization and emergency room visits and improved a surrogate measure of medication compliance but did not have a positive impact on criminal recidivism.

**674 Revisiting Antipsychotic Drug Actions Through Gene Networks Associated With Schizophrenia**

*Karolina Kauppi, Ph.D., et al.*

This study takes an innovative approach to examining biological mechanisms of disease and treatment with some implications for future drug development. The novel and significant findings are that schizophrenia risk genes are located closer to each other in the network space than expected by chance, forming a distinct “schizophrenia disease module.”

COMMUNICATIONS AND UPDATES

LETTERS TO THE EDITOR

**683 Comment on the Association of Hormonal Contraception With Suicide Attempts and Suicides**

*Ivan Berlin, M.D., Ph.D., et al.*

**684 Clarifying Methods and Results in Studies of the Association Between Hormonal Contraception and Mental Health Issues: Response to Berlin et al.**

*Charlotte Wessel Skovlund, Ph.D.*

**684 Would Addressing Alcohol Consumption Further Account for Variance in Methylation?**

*Robert A. Philibert, M.D., Ph.D., Steven R.H. Beach, Ph.D.*

BOOK FORUM

**686 Blue Dreams: The Science and the Story of the Drugs That Changed Our Minds**

*A. John Rush, M.D.*

**687 Interpersonal Psychotherapy for Posttraumatic Stress Disorder**

*Joel Yager, M.D.*

**Book Forum, continued**

**688 The Addiction Solution: Treating Our Dependence on Opioids and Other Drugs**

*Andrew J. Saxon, M.D.*

**APA OFFICIAL ACTIONS**

**690 Reports to the Membership**

**OTHER ITEMS OF INTEREST**

**685 Corrections**

**703 Continuing Medical Education**

**A6 Chairpersons of APA Councils, Committees, and Task Forces**

**C3 Subscription and Business Information**

**Cover:** Dr. Allan McLane Hamilton, grandson of Alexander Hamilton, achieved professional renown of his own in the fields of neurology and forensic psychiatry. His life is highlighted in this issue's Images in Psychiatry (p. 605). [Credits: Everett Historical (Alexander Hamilton, 1755–1804, engraving 1859) and Amesto, Shutterstock.com.]

**La Tabla de Contenidos de Este Número Está Disponible en Español**

*[This issue's Table of Contents is available in Spanish]*

*(Abstracts are also available in Spanish)*

Translation presented in collaboration with the Office of Global Health,  
Rutgers-Robert Wood Johnson Medical School.

Support for this effort provided by ACTA Colombia.

**Translation courtesy of**

**Sergi Casals, M.A.**

Garuna, Medellin, Colombia  
([www.garunaeditors.com](http://www.garunaeditors.com))

**Carlos López Jaramillo, M.D., M.Sc., Ph.D.**

Universidad de Antioquia,  
Medellin, Colombia

**Javier I. Escobar, M.D., M.Sc.**

Rutgers-Robert Wood Johnson  
Medical School

**AUDIO** Highlighted in AJP Audio, a downloadable .mp3 file available at [ajp.psychiatryonline.org](http://ajp.psychiatryonline.org)

**CME** A course covering the content of this article is available online for paid subscribers to the AJP CME Course program

**EDITORIAL** Discussed in one of the issue's editorials

**VIDEO** Highlighted online by Deputy Editor Daniel S. Pine, M.D.

# THE AMERICAN PSYCHIATRIC ASSOCIATION

800 Maine Avenue, S.W., Suite 900, Washington, D.C. 20024

(888) 357-7924 (toll-free inside the U.S. and Canada)

web site: [www.psychiatry.org](http://www.psychiatry.org) • e-mail: [apa@psych.org](mailto:apa@psych.org)

## Chairpersons of Councils, Committees, and Task Forces

### Standing Committees

|                             |                             |
|-----------------------------|-----------------------------|
| <b>Bylaws</b>               | Esperanza Diaz, M.D.        |
| <b>Elections</b>            | Joseph A. Cheong, M.D.      |
| <b>Ethics</b>               | Ezra E.H. Griffith, M.D.    |
| <b>Finance and Budget</b>   | Ann Marie T. Sullivan, M.D. |
| <i>Audit</i>                | Gregory W. Dalack, M.D.     |
| <i>Investment Oversight</i> | David Fassler, M.D.         |
| <b>Joint Reference</b>      | Bruce J. Schwartz, M.D.     |
| <b>Membership</b>           | William Arroyo, M.D.        |
| <b>Nominating</b>           | Anita S. Everett, M.D.      |
| <b>Tellers</b>              | Jose P. Vito, M.D.          |

### Non-Standing Committee

|                             |                              |
|-----------------------------|------------------------------|
| <b>Conflict of Interest</b> | Philip R. Muskin, M.D., M.A. |
|-----------------------------|------------------------------|

### Councils

#### Council on Addiction Psychiatry

Andrew J. Saxon, M.D.

#### Council on Advocacy and Government Relations

Patrick S. Runnels, M.D.

*Advocacy and Litigation Funding*

Bhasker J. Dave, M.D.

#### Council on Children, Adolescents, and Their Families

Steven N. Adelsheim, M.D.

#### Council on Communications

Carol A. Bernstein, M.D.

#### Council on Consultation-Liaison Psychiatry

David F. Gitlin, M.D.

#### Council on Geriatric Psychiatry

Robert P. Roca, M.D.

#### Council on Healthcare Systems and Financing

Harsh K. Trivedi, M.D.

*Integrated Care*

Ken C. Hopper, M.D.

*Reimbursement for Psychiatric Care*

Laurence H. Miller, M.D.

*RBRVS, Codes and Reimbursement*

Gregory G. Harris, M.D.

*Telepsychiatry*

James H. Shore, M.D.

#### Council on International Psychiatry

Bernardo Ng, M.D.

*Chester Pierce Human Rights Award Committee*

James L. Griffith, M.D.

#### Council on Medical Education and Lifelong Learning

Mark H. Rapaport, M.D.

*Scientific Program*

Jacqueline M. Feldman, M.D.

*Scientific Program—IPS (Oct. to Oct. tenure)*

Glenda L. Wrenn, M.D.

*Vestermark Award Committee*

Lowell D. Tong, M.D.

#### Council on Minority Mental Health and Health Disparities

Christina V. Mangurian, M.D.

#### Council on Psychiatry and Law

Debra A. Pinals, M.D.

*Judicial Action*

Marvin S. Swartz, M.D.

#### Council on Quality Care

Grayson S. Norquist, M.D.

*Mental Health Information Technology*

Brent Nelson, M.D.

*Performance Measures*

Karen Pierce, M.D.

*Practice Guidelines*

Daniel J. Anzia, M.D.

#### Council on Research

Dwight L. Evans, M.D.

*Psychiatric Dimensions of Disasters*

Joshua C. Morganstein, M.D.







# Go Online

Visit [ajp.psychiatryonline.org](http://ajp.psychiatryonline.org) for these features!

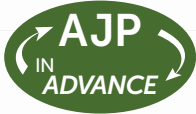

## AJP in Advance

*Discover the latest research advances before they appear in print*

### **Prevalence and Correlates of Prescription Stimulant Use, Misuse, Use Disorders, and Motivations for Misuse Among Adults in the United States**

The most common reasons for misuse of prescription stimulant medication were for the direct effects to improve performance, including for alertness, for concentration, or as a study aid. Patients who are using their medication for cognitive enhancement or diverting their medication to others present a high risk.

### **Epigenetic Aging in Major Depressive Disorder**

Epigenetics represents one of the more exciting areas of research. Major questions exist on the clinical relevance of this process. The authors provide novel information on the relationships among ageing, major depressive disorder, and DNA methylation, an important form of epigenetic change. Importantly, their analyses considered both data from living patients and post-mortem tissue. Both sets of data suggested that epigenetic changes associated with aging occur more strongly in subjects with a history of depression, relative to no such history.

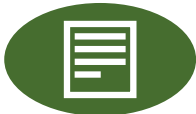

## AJP CME

*Earn CME credit: 3 courses per issue*

This month's courses appear on pages 703–706. Each short course is based on one article in this issue and can earn up to 1 *AMA PRA Category 1 Credit*<sup>™</sup>. CME credit is issued only **online**, and a paid subscription to AJP's CME course program is required.

Visit [psychiatryonline.org/cme](http://psychiatryonline.org/cme) and click on the "American Journal of Psychiatry" tab.

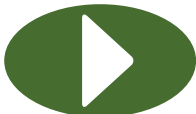

## AJP Multimedia

*Access Audio or Video for highlights of each issue*

In AJP Audio this month, Executive Editor Michael Roy talks with M. Camille Hoffman, M.D., about her research on the use of nutritional supplements in pregnancy. Michael Roy also speaks with Danny Pine about a clinical trial involving intranasal esketamine and whether a framework can be established for its safe use. Other highlights: patients with comorbid depression and hypothyroidism, how physical activity can affect depression, and treatment of alcohol-dependent adults who are involved with the criminal justice system.

In this month's video, Deputy Editor Danny Pine, M.D., discusses the articles "Prenatal Primary Prevention of Mental Illness by Micronutrient Supplements in Pregnancy" and "Efficacy and Safety of Intranasal Esketamine for the Rapid Reduction of Symptoms of Depression and Suicidality in Patients at Imminent Risk for Suicide: Results of a Double-Blind, Randomized, Placebo-Controlled Study."

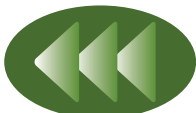

## History of Psychiatry

*Revisit the field's rich history through the pages of AJP*

### **100 and 75 years ago this month: Effects of War**

One sees a lot of the world in 175 years, including its wars. 100 years ago this month: "Traumatic and Emotional Psychoses: So-Called Shell Shock." Fast forward 25 years: the entire July 1943 issue is devoted to psychiatric issues facing the armed forces.

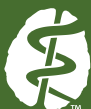

Source: https://psychiatryonline.org/doi/suppl/10.1176/ajp.2018.175.issue-7/suppl_file/front.pdf
